1 **Title Page**

2

3 **Manuscript Title:** Metal concentrations in breastmilk of Fuzhou nursing mothers  
4 associates with dietary and lifestyle factors

5

6 **Authors:** Lin Qi <sup>a</sup>, Vic Shao-Chih Chiang<sup>b</sup>, Qiu-Yan Lu <sup>a</sup>, Jing-yuan Wen <sup>c</sup>,  
7 Rongxian Xu <sup>d\*</sup>

8

9 **Affiliation:**

10 <sup>a</sup> Fujian Provincial Key Laboratory of Zoonosis Research, Fujian Centre for  
11 Disease Control & Prevention, Fuzhou 350001, China

12 <sup>b</sup> UCL Institute of Ophthalmology, University College London, 11-43 Bath  
13 Street, London EC1V 9EL, UK

14 <sup>c</sup> School of Pharmacy, Faculty of Medical and Health Science, The University of  
15 Auckland, Auckland 1142, New Zealand

16 <sup>d</sup> Public Health School, Fujian Medical University, Fuzhou 350108, China

17

18 **\* Corresponding author:** Professor Rongxian Xu

19 Tel: +86 13023831963, 64 2108516764

20 Fax: +86 0591 22682003

21 Address: No.1 Xue Yuan Road, Shang Jie Town, Min Hou, Fuzhou, China

22 E-mail: rong1963cn@aliyun.com

23 **Abstract (250 words maximum)**

24 Metal intake greatly influences physiological development during infancy. For  
25 infants, breastmilk is the major route of metal exposure. The metal status of their  
26 nursing mothers is affected by lifestyle and nutritional factors. However, the  
27 relationship between these factors and breastmilk metal concentration is largely  
28 unknown.

29 The present study provided food frequency questionnaires to be completed by 113  
30 nursing mothers from Fujian Provincial Hospital. Their breastmilk samples were  
31 analysed for the metal concentrations using inductively coupled plasma mass  
32 spectrometry (ICP-MS). Based on the outcome of the questionnaires and ICP-  
33 MS results, a total of 94 samples were deemed valid for further data analyses.

34 Results showed levels of breastmilk lead (Pb) and iron (Fe) were outside the  
35 reference range from authoritative data. Correlation analyses found Pb levels to  
36 negatively associate with dietary fibre intake. Additionally, Fe levels were  
37 negatively associated with alcohol and dairy consumption. In terms of Zn levels, it  
38 was positively associated with tea and vitamin B1 intake. Zn was also negatively  
39 associated with seafood consumption.

40 The study concluded dietary factors to associate with metal levels within  
41 breastmilk. Recommendations were made to increase consumption of dietary fibre,  
42 tea and foods rich in vitamin B1 for gestational and postpartum women.  
43 Conversely, alcohol consumption continues to be discouraged for this population.  
44 Furthermore, careful considerations need to be taken for levels of dairy and  
45 seafood intake to minimize metal metabolism disruptions. Infant metal exposure

46 requires critical attention and this needs to be initiated through the diet and  
47 lifestyle of their nursing mothers.

48

49 **Keywords (6)** ICP-MS; infant; iron; lead; zinc

50

51 **Abbreviations:** IAEA, International Atomic Energy Agency; NFSS, National  
52 Food Safety Standards; Al, Aluminium; As, Arsenic; Ba, Barium; Ca, Calcium;  
53 Cd, Cadmium; Cr, Chromium; Cu, Copper; Fe, Iron; K, Potassium; Mg,  
54 Magnesium; Mn, Manganese; Na, Sodium; Ni, Nickel; Sb, Antimony; Se,  
55 Selenium; Zn, Zinc

56

57

## 58 **1. Introduction**

59 There is a rapid growth and development during infancy until two years of age (1).  
60 Metal provides important biological functions during infancy phase (1). It was  
61 reported that zinc (Zn) and iron (Fe) play important roles in haematopoiesis,  
62 immune function and neurodevelopment (1). Fe deficiency is a prevalent problem  
63 worldwide (2). It leads to adverse long term health consequences such as in  
64 neuropsychological function (3, 4). Another important metal, calcium (Ca) is the  
65 essential building blocks for teeth and bones as well as other roles in muscle  
66 contraction, neurotransmission and vascular functions. Conversely, metals may  
67 exert detrimental effects on infant development including lead (Pb), cadmium  
68 (Cd), Arsenic (As) and aluminium (Al) (5-7).

69 Since breastmilk is generally the sole food for infants (8), it is a most significant  
70 source of these metals (9). Breastfeeding is recommended to be carried out  
71 exclusively until six months of infant age and partially until one year of infant age  
72 (10). Lactation occurs through endocrine system control of progesterone,  
73 oestrogen, prolactin and oxytocin (11). In the early stage of postpartum,  
74 breastmilk is produced in a form of colostrum (12), and differentially profiled  
75 breastmilk is lactated including foremilk and hindmilk (12). Breastfeeding has  
76 been associated with long term obesity prevention, better skeletal outcomes and  
77 improved cognition in offsprings (13-15).

78 Diet contributes as a substantial source of metal intake. Randomized clinical trials  
79 have demonstrated beef consumption to improve Fe status in athletes and young  
80 women (16, 17). In contrast, harmful metals may also be transferred through  
81 dietary sources. This is evident for Cd, Pb and As that have contaminated

82 vegetables or other food agricultural crops in China (18, 19). Few researches have  
83 shown the association between nutrient intakes with changes in the breastmilk  
84 composition. For example, Ca supplementation in Gambian women was able to  
85 improve their breastmilk Ca concentrations (20). Furthermore, multivitamin  
86 supplementation improved vitamin E and retinol concentrations in breastmilk of  
87 Tanzanian HIV-infected nursing mothers (21).

88 Other environmental factors are also important influences of metal intake such as  
89 the use of public transport and exposure to cigarette smoke (22, 23). Additional  
90 studies have demonstrated environmental factors to influence the breastmilk  
91 composition. In a study of investigating breastmilk from Brazillian mothers, they  
92 found similar metal profiles between their drinking water and their breastmilk (24).  
93 In another study, Iranian mothers were analysed for their breastmilk and a variety  
94 of environmental factors (25). Their Cd levels appeared higher when they resided  
95 near the city waste disposal site. They additionally found unemployed mothers to  
96 possess higher Pb levels, possibly due to more frequent Pb exposure from house  
97 chores (25).

98 While breastmilk is imperative for infant health, there is exceedingly limited  
99 research surrounding maternal nutrition on breastmilk composition. Deficiency in  
100 essential metals and excessive intake of harmful metals during infancy remains a  
101 global issue. This needs to be strategized through their nursing mothers. As such,  
102 the present study aimed to analyse the relationship between dietary habits and  
103 breastmilk metal profile. There were more studies addressing the relationship  
104 between lifestyle factors with breastmilk metal profile. Different lifestyle factors

105 were simultaneously assessed using the same cohort of Fuzhou nursing mothers at  
106 postpartum period of day 42.

107 **2. Methods**

108 *3.1 Study Subjects*

109 Nursing mothers that seek medical care in Fujian Provincial Hospital (2012  
110 January – April), were selected to investigate their lifestyle, dietary habits and  
111 health status. They lived in the Fuzhou area long term. Exclusion criteria included  
112 absence of alcohol, tobacco and recent medication consumption. Those with  
113 breast, mammary gland, heart, liver, lung, kidney, congenital and genetic diseases  
114 were also excluded from the study. The study was approved by the Biomedical  
115 research Ethics Committee at Fujian Centre for Disease Control & Prevention.

116 *3.2 Food Frequency Questionnaires*

117 Food frequency questionnaires were used for the nursing mothers to record their  
118 diet during their first 30 days of their postpartum period (n = 113). The nursing  
119 mothers were trained prior to the study including in the project definitions, dietary  
120 investigation methods, food and cutlery items, sample collection and clinical data.  
121 The questionnaires were modified according to feedbacks given during the  
122 training sessions to maximize clarity. The questionnaires were immediately  
123 reviewed after retrieval in order for prompt corrections where necessary.

124 *3.3 Breastmilk analysis*

125 Their breastmilk samples of 20 mL were collected at postpartum period of day 42.  
126 These were stored immediately at -20 °C until analysis (n = 113). 400µL of 69%  
127 nitric acid and 400µL of H<sub>2</sub>O<sub>2</sub> (400µL) were added to 200 µL of breastmilk. Mars-  
128 5 microwave dissolver (CEM, Matthews, NC, USA) was used to dissolve the  
129 samples and then further diluted down to 5 g using deionized water. The metals



130 were analysed on an Agilent 7500 ce inductively coupled plasma mass  
131 spectrometer (Agilent Technologies, Wilmington, DE, USA). These included  
132 aluminium (Al), arsenic (As), barium (Ba), calcium (Ca), cadmium (Cd),  
133 chromium (Cr), copper (Cu), iron (Fe), potassium (K), magnesium (Mg),  
134 manganese (Mn), sodium (Na), nickel (Ni), antimony (Sb), selenium (Se) and zinc  
135 (Zn). It was conducted using external standard of certified standard reference  
136 material (GBW08509a defatted milk powder, National Research Center for  
137 Certified Reference Materials, Beijing, China). Parallel sampling of 10%  
138 breastmilk was used to minimize bias from inter-run variation.

### 139 3.4 Data Analysis

140 The questionnaires were inspected, coded, assigned and the data was doubly  
141 entered (EpiData *- which version*, Odense, Denmark). The entered data were  
142 checked repeatedly to ensure the entered data concords with the original data.  
143 Based on questionnaire completion and breastmilk abnormalities, 94 samples  
144 were used for further analysis.

145 Statistical analysis was carried out using SPSS 13.0 (IBM, Armonk, NY, US).  
146 Normality testing of breastmilk metals found K, Ca, Cu, Mg and Se to be Normal  
147 distributed and proceeded with multiple linear regression analysis ( $\alpha = 0.05$ ).  
148 Comparison between single metals were made using analysis of variance ( $\alpha =$   
149  $0.05$ , normal distribution) and non-parametric Mann-Whitney-Wilcoxon test ( $\alpha =$   
150  $0.05$ , non-normal distribution). Pearson's correlation (normal distributed) and  
151 Spearman correlation (non-normal distributed) two-sided tests were also  
152 conducted (significance level  $p < 0.05$ ). The variable assignment of influencing  
153 factors presented in Table 1.

154 **3. Results**

155 *3.1 Demographics*

156 The demographics of the study subjects were summarised in Table 2. On average,  
157 the study subjects were  $28.5 \pm 3.5$  years of age and were from the plains-type  
158 (Fuzhou five district) geographical location of 74.5%. They were generally  
159 educated with an undergraduate degree of 61.7% and with different occupations.

160 *3.2 Quantity of breastmilk metals*

161 The concentrations of the analysed 17 metals in breastmilk were shown in Table 3.  
162 Due to the lack of meta-analyses of breastmilk metals, the present study had  
163 chosen more authoritative publications for comparison. These include the 1990  
164 World Health Organization (WHO), International Atomic Energy Agency (IAEA)  
165 report of breastmilk metal concentrations and the raw milk contaminant limits  
166 from National Food Safety Standards (NFSS) (GB2762 – 2012).

167 In comparison to the IAEA report, Mg, Cu and Zn were within normal  
168 concentrations. K, Na and Ca were slightly higher than normal, but Pb was four  
169 times higher. Fe and Se were found to be lower. In reference to the NFSS, Cr, As  
170 and Pb were lower than the limit.

171 *3.3 Influencing factors of normal distributed breastmilk metals*

172 Ca concentration was influenced by the delivery method, with vaginal > assisted  
173 vaginal > Caesarean ( $b' = -0.267$ ,  $p < 0.05$ ). Subjects with sufficient dairy intake or  
174 meat intake (according to nursing mothers food pyramid) (26) had higher Cu ( $b' =$   
175  $0.300$ ;  $p < 0.01$ ) and Se ( $b' = 0.213$ ,  $p < 0.05$ ) levels, respectively. None of the  
176 selected independent variables had collinearity between them (variance inflation

177 factor <5).

#### 178 *3.4 Influencing factors of non-normal distributed breastmilk metals*

179 The level of element As in the breastmilk differed with geographical location  
180 ( $p < 0.05$ ). The exposure to smoking environment for more than 15 minutes per day  
181 associated with lower K levels and higher Al and Cd levels ( $p < 0.05$ ). Alcohol and  
182 tea consumption prior to gestation associated with lower Fe ( $p < 0.05$ ) and higher  
183 Zn ( $p < 0.05$ ) levels, respectively. Adequate intake of fruits, dairy and vitamin B<sub>1</sub>  
184 were found to associate with higher Sb ( $p < 0.05$ ), lower Ni ( $p < 0.05$ ) and higher Zn  
185 ( $p < 0.05$ ) levels, respectively.

#### 186 *3.5 Correlation analysis of breastmilk metals and diet*

187 The present study found negative correlation between seafood intake with Ca ( $r =$   
188  $-0.146$ ,  $p < 0.05$ ) and Zn levels ( $r = -0.166$ ,  $p < 0.05$ ). There was a positive  
189 correlation with egg consumption and Mn ( $r = 0.170$ ,  $p < 0.05$ ). Cu was correlated  
190 with seafood intake ( $r = -0.163$ ,  $p < 0.05$ ), dairy consumption ( $r = 0.156$ ,  $p < 0.05$ )  
191 and Fe consumption ( $r = -0.141$ ,  $p < 0.05$ ). Sb was correlated with fruit  
192 consumption ( $r = 0.165$ ,  $p < 0.05$ ), vitamin E intake ( $r = 0.148$ ,  $p < 0.05$ ) and  
193 Vitamin B<sub>12</sub> intake ( $r = 0.147$ ,  $p < 0.05$ ).

194

195 **4. Discussion**

196 The importance of metals for infant development is unambiguous. These include  
197 Fe for neurodevelopment (27), Zn for immunity (28), Ca for bone mineralization  
198 (29) and Cu for cardiovascular health (30). Conversely, contaminant metals can  
199 lead to adverse events in the infant such as alterations in memory by excessive Pb  
200 (31). Due to their sole food being generally breastmilk during infancy (8), it is  
201 therefore the predominant source of these metals (9). Retrospectively, the  
202 exposure of these metals in the nursing mothers primarily derives from the  
203 external environment through means of diet (18, 19) and lifestyle (22, 23).

204 There were few studies conducted to evaluate how whole diet influence the metal  
205 concentrations within breastmilk. Existing studies has been focused on  
206 nutraceutical supplementation (20, 32). There were more studies that investigated  
207 how lifestyle affects breastmilk metal concentrations (24, 25). In the present  
208 study, we investigated how dietary habits related to the metal profile  
209 concentrations in the breastmilk of nursing mothers. In complementary to this,  
210 their lifestyles were also evaluated. Since breastmilk exposes infants to a wide  
211 range of both physiologically beneficial and adverse metals, this study allows  
212 better optimization of infant health. This could be facilitated through improved  
213 lifestyle and dietary recommendations to both gestational and postpartum mothers.  
214 In comparison to the IAEA report, the Pb levels of 19.1  $\mu\text{g}/\text{kg}$  found in the  
215 breastmilk of the present study exceeded the reference range by approximately  
216 four times (2 - 5  $\mu\text{g}/\text{kg}$ ). In aging primates, the infant exposure to Pb  
217 reprogrammed a wide array of their gene expression through epigenetics (33).  
218 These genes contributed to increased propensity of neurodegenerative diseases

219 such as Alzheimer’s disease. In terms of a more immediate impact, the *in utero*  
220 exposure to Pb was associated with lower overall, cognitive and language scores  
221 of the “Comprehensive Developmental Inventory for Infants and Toddlers” at two  
222 years of age (34). Other breastmilk studies also revealed excessive Pb levels of a  
223 shocking 40.6 µg/kg from China (35) and 40.6 µg/kg from Mexico (36). These  
224 demonstrated that excess amount of Pb in breastmilk may be a prevalent issue in  
225 China and also of substantial global concern.

226 The present study found negative associations of Pb with dietary fibre intake. This  
227 relationship may relate to the influence of dietary fibre on Pb absorption, retention  
228 and excretion. It has been demonstrated that dietary fibre can modify tissue  
229 retention of Pb in male Lister rats with varying degrees with different types of  
230 dietary fibre (37). Recently, pectin and alginate-based dietary fibres were found to  
231 bind to Pb, preventing their gastrointestinal absorption and tissue accumulation, as  
232 well as increasing their faecal excretion in male Wistar rats (38).

233 The Fe levels of 321 µg/kg in the present study were below the reference range  
234 recommended by the IAEA report of 350 – 750 µg/kg. Fe deficiency during  
235 infancy is known to lead to adverse health outcomes in the long term (3, 4). In one  
236 study involving Chilean children, Fe deficiency anaemia at six or twelve months  
237 into infancy was associated with neuroendocrine changes in cortisol response at  
238 ten years of age (4). A more recent study by the same research group found Fe  
239 deficiency during infancy was associated with poorer psychological health and  
240 educational achievements at 25 years of age (3). The prevalence of iron deficiency  
241 in breastfed infants differs in different parts of the world, such as 6% in Sweden,  
242 17% in Mexico and as high as 37% in Ghana (2). These figures in combination

243 with our results express the need to address this Fe deficiency problem at the  
244 global level.

245 Alcohol consumption was found to negatively associate with Fe levels. This result  
246 is in disagreement with all of the previous studies which found alcohol  
247 consumption to increase the Fe levels (39-42). The molecular mechanisms  
248 underlying this effect remain to be fully elucidated. Emerging evidence suggested  
249 that alcohol consumption up-regulates iron transporter in the intestinal epithelium  
250 (42). This discrepancy with our results may relate to differences in the study  
251 subjects. We studied exclusively on postpartum nursing mothers, which lie in the  
252 perinatal period that is known to possess unique Fe metabolism (43). Nevertheless,  
253 it is strongly prohibited to consume alcohol to improve Fe status as alcohol causes  
254 many other adversities to the infant that outlies the benefits of sufficient Fe status  
255 (44).

256 In addition to this association, dairy consumption was also negatively associated  
257 with Fe levels. No studies exist to date that have reported on similar findings.  
258 However, there is substantial evidence that consumption of cow's milk was  
259 strongly associated with diminished Fe stores in infants (45). This association was  
260 speculated to be due to the high proportion of Ca and casein, both of which have  
261 shown to interfere with Fe absorption (45). Ca is a known inhibitor of Fe  
262 absorption (46). Cow's milk with higher Ca content has clinically shown to  
263 attribute to lower bioavailability of Fe (46). In another clinical trial, casein was  
264 found to lower Fe bioavailability when it substituted with egg white protein (47).  
265 It is therefore important to balance dairy consumption during postpartum period to  
266 minimize Fe interference but simultaneously obtain sufficient benefits from dairy

267 products. Consumption of dairy products remains important as they provide a  
268 range of health benefits (48).

269 Zn levels in our breastmilk samples were observed to associate with higher tea  
270 consumption. This observation concords with a study where green tea decoction  
271 increased Zn levels in the blood and multiple tissues by using a rat model (49).

272 Green tea extract supplementation has shown similar association in serum samples  
273 of obese patients (50). These effects have been hypothesized to attribute to the  
274 polyphenol interactions with Zn that influences their absorption (51) or the  
275 improved antioxidant status in the body (50). In old Sprague-Dawley rats, effects  
276 of tea consumption on Zn absorption depend on the type of tea (51). However,  
277 other related studies failed to find the presence of these effects (52-55) and  
278 therefore warrant further investigation.

279 Higher vitamin B1 intake was associated with higher Zn levels. This possibly  
280 arise from the simultaneous consumption of foods rich in both Zn and vitamin B1.  
281 For example, 100 g of pork may contribute 33% daily intake of Zn and 50% daily  
282 intake of vitamin B1 (56-58). Mung beans are also excellent sources of Zn and  
283 vitamin B1 with 100 g contributing to 6% daily intake of Zn and 10% daily intake  
284 of vitamin B1 (59, 60). Both of these nutrients are critically important during  
285 infancy (61-63). Zn is involved in protein synthesis and other cellular processes  
286 (61). Vitamin B1 deficiency causes beriberi, which is characterized with  
287 cardiovascular adversities (62).

288 The present study discovered seafood to negatively associate with Zn levels. This  
289 was a surprising finding because it is known that seafoods such as oyster, scallop,  
290 crabs, acts as a rich source of Zn (64, 65). However, no existing related studies

291 have been found. Furthermore, other types of seafoods were found to be less rich  
292 in Zn including pout, paella and gurnard (64). Therefore, further investigation into  
293 seafood subtypes may be useful. The apparent negative association may relate to  
294 seafood nutrient interactions with Zn metabolism. For example, it has been  
295 demonstrated that many different types of protein affects Zn bioavailability (66-  
296 68). Given the negative association, it is important to balance sufficient Zn intake  
297 without abstaining from seafood because seafood is known to provide a wide  
298 range of benefits perinatally (69).

299 There were several limitations within the present study. The breastmilk samples  
300 were taken at a single postpartum time point, which may not be representative of  
301 its metal concentrations in the extended postpartum period. Furthermore, only  
302 Fuzhou subjects that visited the Fujian Provincial Hospital were recruited. This  
303 reduces the translation of our findings to the entire Fuzhou, greater China and at  
304 the global level. The sample size of the study was too small to conclude on any  
305 associations observed. In saying that, this research still presents value due to the  
306 lack of breastmilk nutrition research and the critical global concern for metal  
307 intake during infancy. The observed associations provided entry for further  
308 conclusive research to be made. The restricted origin of the study subjects  
309 provided a specifically defined cohort that allowed meaningful breastmilk data to  
310 be compiled. Having samples from mixed regions could create substantial bias  
311 due to the significant influence of environment on breastmilk characteristics (70).  
312 The results draws attention to possible existing breastmilk issues within the region  
313 that can inspire further research to be translated to a wider population.



314 In future studies, multiple breastmilk samples across the postpartum period would  
315 be beneficial to evaluate the results or trends. This can be complemented by the  
316 physiological parameters of the infant for correlations to be made or metabolic  
317 adaptations to be identified. In order to attain results with higher robustness, the  
318 sample size needs to be increased. The Fuzhou population can be more  
319 represented if future studies involve multiple Fuzhou hospitals in both rural and  
320 urban areas. The associations found in the present study should be explored  
321 further in more details. This includes higher characterization of dietary  
322 components or carrying out randomized clinical trials. With a more targeted focus,  
323 multiple types of measurements of metals can reduce impact from weakness of  
324 particular experimental methodologies.

325

## 326 **5. Conclusion**

327 The present study addressed the breastmilk metal status in Fuzhou nursing  
328 mothers at postpartum period of 42 days. Multiple associations were made for  
329 these with lifestyle and dietary factors. It was discovered that excess Pb associated  
330 negatively with dietary fibre intake. Therefore, it is recommended to increase  
331 dietary fibre intake that may decrease adverse Pb transfer from breastmilk to the  
332 infants. Additionally, there appears to be a state of Fe deficiency and these levels  
333 were negatively associated with alcohol and dairy consumption. Thus, care should  
334 be taken to avoid Fe deficiency. This could be improved through abstinence from  
335 alcoholic beverages and regarding the risk-benefit balance for dairy products.

336 In terms of the Zn levels, positive associations were found with tea and vitamin  
337 B1 intake as well as negative associations with seafood. These findings encourage  
338 drinking tea and consuming foods that are rich in Zn and vitamin B1 (e.g. pork,  
339 mung beans). Conversely, seafood should be consumed in moderation by judging  
340 between its derived benefits and possible adverse effects on Zn metabolism.

341 The present study addressed research gaps surrounding breastmilk metal levels  
342 with maternal dietary factors. This is an important topic at the global level  
343 because of breastmilk being the predominant source of nutrients for infants.  
344 Heavy metal intake and deficiency of essential metals during infancy are a  
345 worldwide concern due to its prevalence and its long term impact into adulthood.  
346 By understanding the nutritional contribution to breastmilk metals in nursing  
347 mothers, adverse events can be minimized for the infants during breastfeeding in  
348 order to optimize their developmental potential.

349 **Role of funding source**

350 This research was supported by “Major Projects of Science and Technology of  
351 Fujian Province” under the programme “technical research of genetic birth defects  
352 in fujian province early screening, diagnosis and treatment”, granted for a period  
353 from October 2013 to September 2017 (project number: 2013YZ0002-1).

354

355 **Conflict of interest**

356 The authors declare that they have no competing interests.

357

358 **Acknowledgements**

359 The authors would like to thank the chief physician, Pin Ge and physician, Guo-  
360 Bo Li from Fujian Province Maternity and Child Care Center, Fujian Province  
361 Children’s hospital for their assistance to the sample and questionnaire collection.  
362 The authors would like to thank the senior technologist, Guo-Bin Lin from Fujian  
363 Center for Disease Control & Prevention for his assistance with sample testing and  
364 data analysis. The authors would like to thank the participation of the postpartum  
365 women.

366

367

368 **References**

- 369 1. Hermoso M, Tabacchi G, Iglesia-Altaba I, Bel-Serrat S, Moreno-Aznar LA,  
370 Garcia-Santos Y, et al. The nutritional requirements of infants.towards EU  
371 alignment of reference values: The EURRECA network. *Matern Child Nutr.*  
372 2010;6:55 - 83.
- 373 2. Yang Z, Lonnerdal B, Adu-Afarwuah S, Brown KH, Chaparro CM, Cohen RJ,  
374 et al. Prevalence and predictors of iron deficiency in fully breastfed infants at 6  
375 months of age: Comparison of data from 6 studies. *Am J Clin Nutr.* 2009;89:1433  
376 - 1440.
- 377 3. Lozoff B, Smith JB, Kaciroti N, Clark KM, Guevara S, Jimenez E. Functional  
378 significance of early-life iron deficiency: Outcomes at 25 years. *J Pediatr.*  
379 2013;163(5):1260 - 1266.
- 380 4. Felt BT, Peirano P, Algarin C, Chamorro R, Sir T, Kaciroti N, et al. Long-term  
381 neuroendocrine effects of iron-deficiency anemia in infancy. *Pediatr Re.*  
382 2012;71(6):707 - 712.
- 383 5. Kim Y, Ha EH, Park H, Ha M, Kim Y, Hong YC, et al. Prenatal lead and  
384 cadmium co-exposure and infant neurodevelopment at 6 months of age: The  
385 mothers and children's environmental health (MOCEH) study. *NeuroToxicology.*  
386 2013;35:15 - 22.
- 387 6. Sakamoto M, Chan HM, Domingo JL, Kubota M, Murata K. Changes in body  
388 burden of mercury, lead, arsenic, cadmium and selenium in infants during early  
389 lactation in comparison with placental transfer. *Ecotoxicol Environ Saf.*  
390 2012;84:179 - 184.
- 391 7. Dabeka R, Fouquet A, Belisle S, Turcotte S. Lead, cadmium and aluminum in  
392 canadian infant formulae, oral electrolytes and glucose solutions. *Food Addit*  
393 *Contam.* 2011;28(6):744 - 753.
- 394 8. Johns HM, Forster DA, Amir LH, McLachlan HL. Prevalence and outcomes of  
395 breast milk expressing in women with healthy term infants: A systematic review.  
396 *BMC Pregnancy Childbirth.* 2013;13:212.
- 397 9. Gidrewicz DA, Fenton TR. A systematic review and meta-analysis of the  
398 nutrient content of preterm and term breast milk. *BMC Pediatr.* 2014;14:216.
- 399 10. Hunter T, Cattelona G. Breastfeeding initiation and duration in first-time  
400 mothers: Exploring the impact of father involvement in the early post-partum  
401 period. *Health Promot Perspect.* 2014;4(2):132 - 136.

- 402 11. Stuebe AM, Grewen K, Pedersen CA, Propper C, Meltzer-Brody S. Failed  
403 lactation and perinatal depression: Common problems with shared neuroendocrine  
404 mechanisms? *J Womens Health*. 2012;21(3):264 - 272.
- 405 12. Mangel L, Ovental A, Batscha N, Arnon M, Yarkoni I, Dollberg S. High fat  
406 content in breastmilk expressed manually: A randomized trial. *Breastfeed Med*.  
407 2015.
- 408 13. Moss BG, Yeaton WH. Early childhood healthy and obese weight status:  
409 Potentially protective benefits of breastfeeding and delaying solid foods. *Matern*  
410 *Child Health J*. 2014;18:1224 - 1232.
- 411 14. Jones G, Hynes KL, Dwyer T. The association between breastfeeding,  
412 maternal smoking in utero, and birth weight with bone mass and fractures in  
413 adolescents: A 16-year longitudinal study. *Osteoporos Int*. 2013;24:1605 - 1611.
- 414 15. Belfort MB, Rifas-Shiman SL, Kleinman KP, Guthrie LB, Bellinger DC,  
415 Taveras EM, et al. Infant feeding and childhood cognition at ages 3 and 7 years:  
416 Effects of breastfeeding duration and exclusivity. *JAMA Pediatr*. 2013;167(9):836  
417 - 844.
- 418 16. Blanton C. Improvements in iron status and cognitive function in young  
419 women consuming beef or non-beef lunches. *Nutrients*. 2014;6:90 - 110.
- 420 17. Burke DE, Johnson JV, Vukovich MD, Kattelman KK. Effects of lean beef  
421 supplementation on iron status, body composition and performance of collegiate  
422 distance runners. *Food Nutr Sci*. 2012;3:810 - 821.
- 423 18. Huang Z, Pan XD, Wu PG, Han JL, Chen Q. Heavy metals in vegetables and  
424 the health risk to population in zhejiang, china. *Food Control*. 2014;36:248 - 252.
- 425 19. Zhao Y, Fang X, Mu Y, Cheng Y, Ma Q, Nian H, et al. Metal pollution (cd,  
426 pb, zn, and as) in agricultural soils and soybean, glycine max, in southern china.  
427 *Bull Environ Contam Toxicol*. 2014;92:427 - 432.
- 428 20. Jarjou LMA, Prentice A, Sawo Y, Laskey MA, Bennett J, Goldberg GR, et al.  
429 Randomized, placebo-controlled, calcium supplementation study in pregnant  
430 gambian women: Effects on breast-milk calcium concentrations and infant birth  
431 weight, growth, and bone mineral accretion in the first year of life. *Am J Clin*  
432 *Nutr*. 2006;83:657 - 666.
- 433 21. Webb AL, Aboud S, Furtado J, Murrin C, Campos H, Fawzi WW, et al. Effect  
434 of vitamin supplementation on breast milk concentrations of retinol, carotenoids  
435 and tocopherols in HIV-infected tanzanian women. *Eur J Clin Nutr*. 2009;63:332 -  
436 339.

- 437 22. Gao P, Liu S, Ye W, Lin N, Meng P, Feng Y, et al. Assessment on the  
438 occupational exposure of urban public bus drivers to bioaccessible trace metals  
439 through resuspended fraction of settled bus dust. *Sci Total Environ.* 2015;508:37 -  
440 45.
- 441 23. Rzymiski P, Rzymiski P, Tomczyk K, Niedzielski P, Jakubowski K,  
442 Poniedzialek B, et al. Metal status in human endometrium: Relation to cigarette  
443 smoking and histological lesions. *Environ Res.* 2014;132:328 - 333.
- 444 24. Cardoso OO, Juliao FC, Alves RIS, Baena AR, Diez IG, Suzuki MN, et al.  
445 Concentration profiles of metals in breast milk, drinking water, and soil:  
446 Relationship between matrices. *Biol Trace Elem Res.* 2014;160:116 - 122.
- 447 25. Dursun A, Yurdakok K, Yalcin SS, Tekinalp G, Aykut O, Orhan G, et al.  
448 Maternal risk factors associated with lead, mercury and cadmium levels in  
449 umbilical cord blood, breast milk and newborn hair. *J Matern Fetal Neonatal Med.*  
450 2015:1476-7058.
- 451 26. Chinese Nutrition Society. Dietary guidelines for chinese gestational and  
452 breastfeeding women and children 0 - 6 years of age. 2007th ed. Beijing, China:  
453 People's Medical Publishing House; 2007.
- 454 27. Domellof M, Braegger C, Campoy C, Colomb V, Decsi T, Fewtrell M, et al.  
455 Iron requirements of infants and toddlers. *J Pediatr Gastroenterol Nutr.*  
456 2014;58(1):119 - 129.
- 457 28. Abrams SA. Zinc for preterm infants: Who needs it and how much is needed?  
458 *Am J Clin Nutr.* 2013;98:1373 - 1374.
- 459 29. Trindade CEP. Minerals in the nutrition of extremely low birth weight infants.  
460 *J Pediatr.* 2005;81(1):S43 - S51.
- 461 30. Bhatia J, Griffin I, Anderson D, Kler N, Domellof M. Selected  
462 macro/micronutrient needs of the routine preterm infant. *J Pediatr.*  
463 2013;162(3):S48 - S55.
- 464 31. Geng F, Mai X, Zhan J, Xu L, Shao J, Meeker J, et al. Low-level prenatal lead  
465 exposure alters auditory recognition memory in 2 month old infants: An event-  
466 related potentials (ERPs) study. *Dev Neuropsychol.* 2014;39(7):516 - 528.
- 467 32. Sazawal S, Black RE, Dhingra P, Jalla S, Krebs N, Malik P, et al. Zinc  
468 supplementation does not affect the breast milk zinc concentration of lactating  
469 women belonging to low socioeconomic population. *J Hum Nutr Food Sci.*  
470 2013;1(2):1014.

- 471 33. Bihagi SW, Huang H, Wu J, Zawia NH. Infant exposure to lead (pb) and  
472 epigenetic modifications in the aging primate brain: Implications for alzheimer's  
473 disease. *J Alzheimers Dis.* 2011;27(4):819 - 833.
- 474 34. Lin CC, Chen YC, Su FC, Lin CM, Liao HF, Hwang YH, et al. In utero  
475 exposure to environmental lead and manganese and neurodevelopment at 2 years  
476 of age. *Environ Res.* 2013;123:52 - 57.
- 477 35. Liu K, Hao J, Xu Y, Gu X, Shi J, Dai C, et al. Breast milk lead and cadmium  
478 levels in suburban areas of nanjing, china. *Chin Med J.* 2013;28(1):7 - 15.
- 479 36. Amarasiriwardena CJ, Jayawardene I, Lupoli N, Barnes RM, Hernandez-Avila  
480 M, Hu H, et al. Comparison of digestion procedures and methods for  
481 quantification of trace lead in breast milk by isotope dilution inductively coupled  
482 plasma mass spectrometry. *Anal Methods.* 2013;5:1676.
- 483 37. Rose HE, Quarterman J. Dietary fibers and heavy metal retention in the rat.  
484 *Environ Res.* 1987;42:166 - 175.
- 485 38. Khotimchenko M, Serguschenko I, Khotimchenko Y. Lead absorption and  
486 excretion in rats given insoluble salts of pectin and alginate. *Int J Toxicol.*  
487 2006;25:195 - 203.
- 488 39. Ioannou GN, Dominitz JA, Weiss NS, Hegarty PJ, Kowdley KV. The effect of  
489 alcohol consumption on the prevalence of iron overload, iron deficiency, and iron  
490 deficiency anemia. *Gastroenterology.* 2004;126:1293 - 1301.
- 491 40. Whitfield JB, Zhu G, Heath AC, Powell LW, Martin NG. Effects of alcohol  
492 consumption on indices of iron stores and of iron stores on alcohol intake  
493 markers. *Alcohol Clin Exp Res.* 2001;25(7):1037 - 1045.
- 494 41. Chapman RW, Morgan MY, Laulicht M, Hoffbrand AV, Sherlock S. Hepatic  
495 iron stores and markers of iron overload in alcoholics and patients with idiopathic  
496 hemochromatosis. *Dig Dis Sci.* 1982;27(10):909 - 916.
- 497 42. Harrison-Findik DD. Role of alcohol in the regulation of iron metabolism.  
498 *World J Gastroenterol.* 2007;13(37):4925 - 4930.
- 499 43. Koenig MD, Tussing-Humphreys L, Day J, Cadwell B, Nemeth E. Hpcidin  
500 and iron homeostasis during pregnancy. *Nutrients.* 2014;6:3062 - 3083.
- 501 44. O'Leary CM, Jacoby PJ, Bartu A, D'Antoine H, Bower C. Maternal alcohol  
502 use and sudden infant death syndrome (SIDS) and infant mortality excluding  
503 SIDS. *Pediatrics.* 2013;131(3):e770 - e778.

- 504 45. Ziegler EE. Consumption of cow's milk as a cause of iron deficiency in infants  
505 and toddlers. *Nutr Rev.* 2011;69(1):S37 - S42.
- 506 46. Hallberg L, Rossander-Hulten L, Brune M, Glerup A. Bioavailability in man  
507 of iron in human milk and cow's milk in relation to their calcium contents. *Pediatr*  
508 *Res.* 1992;31(5):524 - 527.
- 509 47. Hurrell RF, Lynch SR, Trinidad TP, Dassenko SA, Cook JD. Iron absorption  
510 in humans as influenced by bovine milk proteins. *Am J Clin Nutr.* 1989;49:546 -  
511 552.
- 512 48. Brantsaeter AL, Olafsdottir AS, Forsum E, Olsen SF, Thorsdottir I. Does milk  
513 and dairy consumption during pregnancy influence fetal growth and infant  
514 birthweight? A systematic literature review. *Food Nutr Res.* 2012;56.
- 515 49. Hamdaoui MH, Chahed A, Ellouze-Chabchoub S, Marouani N, Ben Abid Z,  
516 Hedhili A. Effect of green tea decoction on long-term iron, zinc and selenium  
517 status of rats. *Ann Nutr Metab.* 2005;49:118 - 124.
- 518 50. Suliburska J, Bogdanski P, Szulinska M, Stepien M, Pupek-Musialik D,  
519 Jablecka A. Effects of green tea supplementation on elements, total antioxidants,  
520 lipids, and glucose values in the serum of obese patients. *Biol Trace Elem Res.*  
521 2012;149:315 - 322.
- 522 51. Deng Z, Tao B, Li X, He J, Chen Y. Effect of green tea and black tea on the  
523 metabolisms of mineral elements in old rats. *Biol Trace Elem Res.* 1998;65:75 -  
524 86.
- 525 52. Basu A, Betts NM, Mulugeta A, Tong C, Newman E, Lyons TJ. Green tea  
526 supplementation increases glutathione and plasma antioxidant capacity in adults  
527 with the metabolic syndrome. *Nutr Res.* 2013;33(3):180 - 187.
- 528 53. Ganji V, Kies CV. Zinc bioavailability and tea consumption. *Plant Foods Hum*  
529 *Nutr.* 1994;46:267 - 276.
- 530 54. Perez-Llamas F, Gonzalez D, Cabrera L, Espinosa C, Lopez JA, Larque E, et  
531 al. White tea consumption slightly reduces iron absorption but not growth, food  
532 efficiency, protein utilization, or calcium, phosphorus, magnesium, and zinc  
533 absorption in rats. *J Physiol Biochem.* 2011;67:331 - 337.
- 534 55. Record IR, McInernery JK, Dreosti IE. Black tea, green tea, and tea  
535 polyphenols. effects on trace element status in weanling rats. *Biol Trace Elem*  
536 *Res.* 1996;53:27 - 43.



- 537 56. Lombardi-Boccia G, Lanzi S, Aguzzi A. Aspects of meat quality: Trace  
538 elements and B vitamins in raw and cooked meats. *J Food Compost Anal.*  
539 2005;18(1):39 - 46.
- 540 57. Lombardi-Boccia G, Lanzi S, Lucarini M, di Lullo G. Meat and meat products  
541 consumption in Italy: Contribution to trace elements, heme iron and selected B  
542 vitamins supply. *Int J Vitam Nutr Res.* 2004;74(4):247 - 251.
- 543 58. Murphy MM, Spungen JH, Bi X, Barraj LM. Fresh and fresh lean pork are  
544 substantial sources of key nutrients when these products are consumed by adults  
545 in the United States. *Nutr Res.* 2011;31(10):776 - 783.
- 546 59. Ejigui J, Savoie L, Marin J, Desrosiers T. Influence of traditional processing  
547 methods on the nutritional composition and antinutritional factors of red  
548 peanuts (*arachis hypogea*) and small red kidney beans (*phaseolus vulgaris*). *J Biol*  
549 *Sci.* 2005;5(5):597- 605.
- 550 60. Alonso R, Rubio LA, Muzqui M, Marzo F. The effect of extrusion cooking on  
551 mineral bioavailability in pea and kidney bean seed meals. *Anim Feed Sci*  
552 *Technol.* 2001;94:1 - 13.
- 553 61. Chaffee BW, King JC. Effect of zinc supplementation on pregnancy and infant  
554 outcomes: A systematic review. *Paediatr Perinat Epidemiol.* 2012;26(1):118 -  
555 137.
- 556 62. Porter SG, Coats D, Fischer PR, Ou K, Frank EL, Sreang P, et al. Thiamine  
557 deficiency and cardiac dysfunction in Cambodian infants. *J Pediatr.*  
558 2014;164(6):1456 - 1461.
- 559 63. Bowman BA, Pfeiffer CM, Barfield WD. Thiamine deficiency, beriberi, and  
560 maternal and child health: Why pharmacokinetics matter. *Am J Clin Nutr.*  
561 2013;98:635 - 6336.
- 562 64. Guerin T, Chekri R, Vastel C, Sirot V, Volatier JL, Leblanc JC, et al.  
563 Determination of 20 trace elements in fish and other seafood from the French  
564 market. *Food Chem.* 2011;127:934 - 942.
- 565 65. Bilandzic N, Sedak M, Dokic M, Varenina I, Kolanovic BS, Bozic D, et al.  
566 Determination of zinc concentrations in foods of animal origin, fish and shellfish  
567 from Croatia and assessment of their contribution to dietary intake. *J Food*  
568 *Compost Anal.* 2014;35(2):61 - 66.
- 569 66. Hemalatha S, Gautam S, Platel K, Srinivasan K. Influence of exogenous iron,  
570 calcium, protein and common salt on the bioaccessibility of zinc from cereals and  
571 legumes. *J Trace Elem Med Biol.* 2009;23:75 - 83.

- 572 67. Etcheverry P, Hawthorne KM, Liang L, Abrams SA, Griffin IJ. Effect of beef  
573 and soy proteins on the absorption of non-heme iron and inorganic zinc in  
574 children. *J Am Coll Nutr.* 2006;25(1):34 - 40.
- 575 68. Rosado JL, Diaz M, Gonzalez K, Griffin I, Abrams SA, Preciado R. The  
576 addition of milk or yoghurt to a plant-based diet increases zinc bioavailability but  
577 does not affect iron bioavailability in women. *J Nutr.* 2005;135:465 - 468.
- 578 69. Brantsaeter AL, Birgisdottir BE, Meltzer HM, Kvalem HE, Alexander J,  
579 Magnus P, et al. Maternal seafood consumption and infant birth weight, length  
580 and head circumference in the norwegian mother and child cohort study. *Br J*  
581 *Nutr.* 2012;107:436 - 444.
- 582 70. Lipkie TE, Morrow AL, Jouni ZE, McMahon RJ, Ferruzzi MG. Longitudinal  
583 survey of carotenoids in human milk from urban cohorts in china, mexico, and the  
584 USA. *PLoS ONE.* 2015;10(6):e0127729.
- 585

586 **Tables**

587 Table 1 Influencing factors of breastmilk and their variable assignment.

| Influencing factor       | 0  | 1                | 2                 | 3                 |
|--------------------------|----|------------------|-------------------|-------------------|
| Geographical location    | -  | Mountainous      | Plains            | Coastal           |
| Nursing period           | -  | Beginning        | Intermediate      | Late              |
| Occupation nature        | -  | Minimal exercise | Moderate exercise | Frequent exercise |
| Monthly income           | -  | ≤ 4000 CNY       | 4000 - 8000 CNY   | > 8000 CNY        |
| Smokers in the family    | No | Yes              | -                 | -                 |
| Alcohol consumption      | No | Yes              | -                 | -                 |
| Tea consumption          | No | Yes              | -                 | -                 |
| Exercise before delivery | No | Yes              | -                 | -                 |
| Delivery method          | -  | Vaginal          | Assisted vaginal  | Caesarean         |
| Adequate dairy intake    | No | Yes              | -                 | -                 |
| Adequate meat intake     | No | Yes              | -                 | -                 |

588

589

590 Table 2 Demographics of study subjects.

---

|                                                        |                       |
|--------------------------------------------------------|-----------------------|
| Age                                                    | 28.5±3.5 years of age |
| Geographical Location                                  | n = 94 (100%)         |
| Mountains (Minho, Yongtai)                             | 11 (11.7%)            |
| Plains (Fuzhou five district)                          | 70 (74.5%)            |
| Coastal (Changle, Fuqing, Lianjiang, Luoyuan, Pingtan) | 13 (13.8%)            |
| Education                                              | n = 94 (100%)         |
| Secondary or Under                                     | 26 (27.7%)            |
| Undergraduate                                          | 58 (61.7%)            |
| Postgraduate                                           | 9 (9.6%)              |
| Occupation                                             | n = 94 (100%)         |
| Company Clerk or Others                                | 33 (35.1%)            |
| Professionals & Civil Service                          | 30 (31.9%)            |
| At-Home                                                | 31 (33.0%)            |

---

591

592

593 Table 3 Breastmilk metal concentrations.

| Metal      | Detection Limit     | Breastmilk (n=94) |       | Concentration |       | IAEA Reference | GB2762-2012 Reference |
|------------|---------------------|-------------------|-------|---------------|-------|----------------|-----------------------|
|            |                     | P50               | P25   | P75           |       |                |                       |
| K (mg/kg)  | 2* 10 <sup>-3</sup> | 557.7             | 505.8 | -             | 622.7 | 410-550        |                       |
| Ca (mg/kg) | 2* 10 <sup>-3</sup> | 304.7             | 268   | -             | 347.6 | 220-300        |                       |
| Na (mg/kg) | 5* 10 <sup>-4</sup> | 142.9             | 109   | -             | 192.9 | 90-130         |                       |
| Mg (mg/kg) | 2* 10 <sup>-3</sup> | 31.7              | 29    | -             | 37.8  | 29-38          |                       |
| Al (µg/kg) | 4                   | 159               | 51.6  | -             | 260.1 | -              |                       |
| Cr (µg/kg) | 1.6                 | 4.2               | 1.7   | -             | 7.9   | -              | 300                   |
| Mn (µg/kg) | 0.9                 | 4.1               | ND    | -             | 6.3   | -              |                       |
| Fe (µg/kg) | 0.5                 | 321               | 205.9 | -             | 494.8 | 350-720        |                       |
| Ni (µg/kg) | 0.8                 | ND                | ND    | -             | 2.6   | -              |                       |
| Cu (µg/kg) | 1.5                 | 288.6             | 234.6 | -             | 341.4 | 180-310        |                       |
| Zn (mg/kg) | 0.2                 | 1.6               | 1     | -             | 2.1   | 0.7-2.0        |                       |
| As (µg/kg) | 1                   | 2.8               | 1.2   | -             | 5.2   | -              | 100                   |
| Se (µg/kg) | 0.9                 | 10.5              | 6.8   | -             | 14.9  | 13-24          |                       |
| Cd (µg/kg) | 0.9                 | ND                | ND    | -             | ND    | -              |                       |
| Sb (µg/kg) | 0.2                 | 0.88              | 0.43  | -             | 1.67  | -              |                       |
| Ba (µg/kg) | 0.5                 | 8                 | 2.13  | -             | 20.49 | -              |                       |
| Pb (µg/kg) | 0.6                 | 19.1              | 13.1  | -             | 27.1  | 2 - 5          | 50                    |

- 594 IAEA, International Atomic Energy Agency; ND, Not detected; P50, Median; P25,  
595 Upper quartile; P75, Lower quartile;
